# Supplementary material for: Aerosol assisted chemical vapour deposition of hydrophobic TiO2–SnO2 composite film with novel microstructure and enhanced photocatalytic activity
Source: Royal Society of Chemistry journal article supplement (doi:10.1039/c3ta10845g), 2013-01-01
Supplement: c3ta10845g.pdf [file c3ta10845g.pdf]

## Supplementary Information

### Raman Spectra

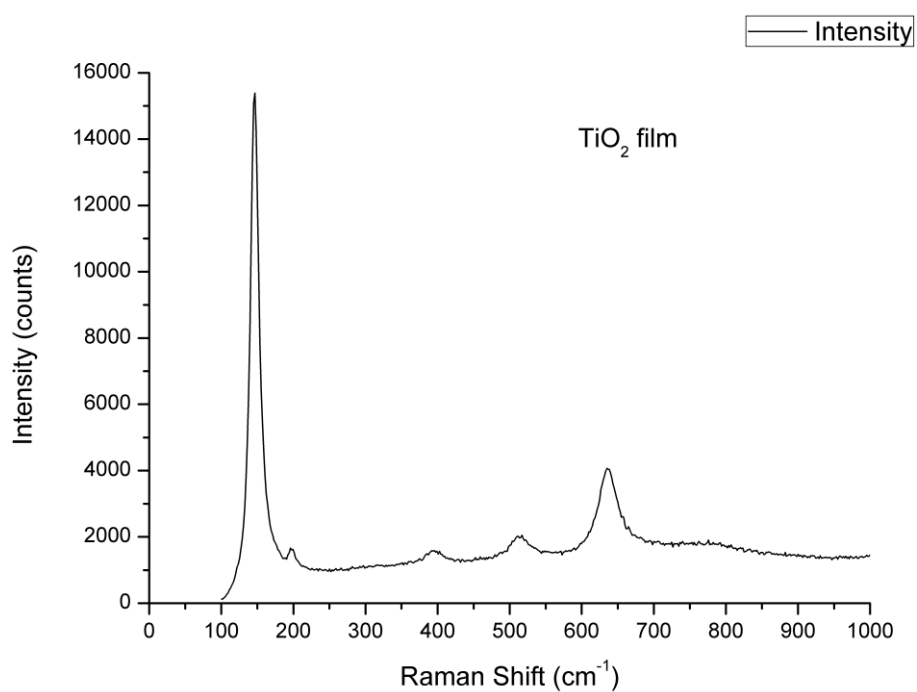

**Figure 1: Raman spectrum of pure TiO<sub>2</sub> film**

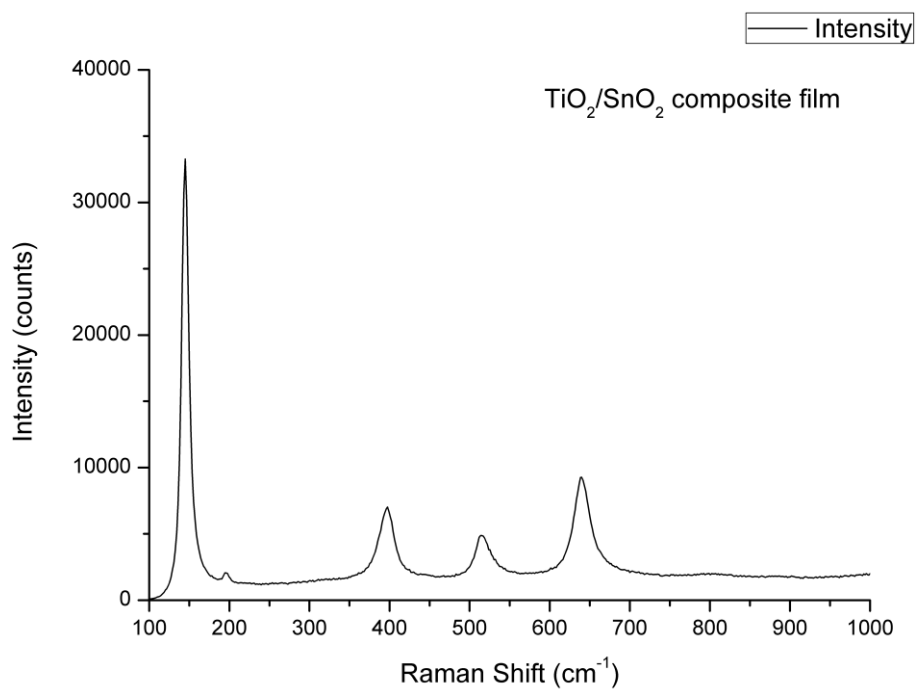

**Figure 2: Raman spectrum of the TiO<sub>2</sub>/SnO<sub>2</sub> composite film**

|          | Atomic % |        |         |        |        |       |
|----------|----------|--------|---------|--------|--------|-------|
|          | O        | Sn     | Ti      | Si     | Cl     | Total |
| Region 1 | 66.1043  | 5.2133 | 24.5663 | 3.964  | 0.1521 | 100   |
| Region 2 | 67.7093  | 5.4244 | 24.7211 | 2.013  | 0.1322 | 100   |
| Region 3 | 68.475   | 5.2007 | 24.2345 | 1.9449 | 0.1449 | 100   |
| Region 4 | 67.6097  | 5.6134 | 24.2173 | 2.4095 | 0.1501 | 100   |
| Average  | 67.47    | 5.36   | 24.43   | 2.58   | 0.14   |       |

**Table 1: Normalised WDX results for TiO<sub>2</sub>/SnO<sub>2</sub> composite film**

|          | Atomic % |        |         |       |
|----------|----------|--------|---------|-------|
|          | O        | Si     | Ti      | Total |
| Region 1 | 65.7256  | 1.4134 | 32.8610 | 100   |
| Region 2 | 64.1428  | 1.1812 | 34.6759 | 100   |
| Region 3 | 63.8853  | 1.8936 | 34.2211 | 100   |
| Region 4 | 63.5345  | 1.7480 | 34.7175 | 100   |
| Average  | 64.3220  | 1.5591 | 34.1189 |       |

**Table 2: Normalised WDX results for TiO<sub>2</sub> film**

|          | Atomic % |         |         |       |
|----------|----------|---------|---------|-------|
|          | O        | Si      | Sn      | Total |
| Region 1 | 67.2726  | 15.7171 | 17.0103 | 100   |
| Region 2 | 65.6802  | 17.6923 | 16.6275 | 100   |
| Region 3 | 67.6002  | 15.4842 | 16.9157 | 100   |
| Region 4 | 67.0944  | 16.3522 | 16.5534 | 100   |
| Average  | 66.9118  | 16.3114 | 16.7767 |       |

**Table 3: Normalised WDX results for SnO<sub>2</sub> film**

### Side-on SEMs

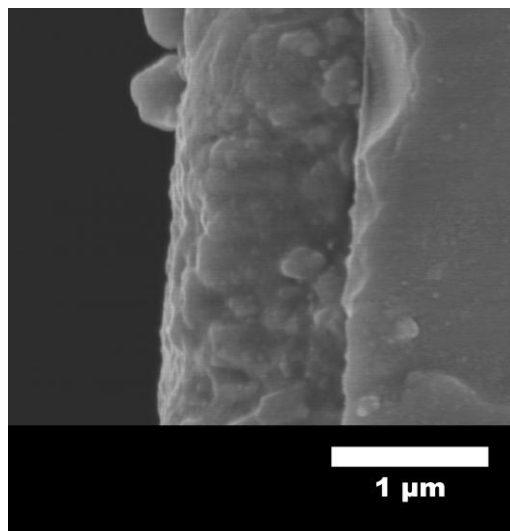

**Figure 3: Side on SEM of the TiO<sub>2</sub>/SnO<sub>2</sub> composite film**

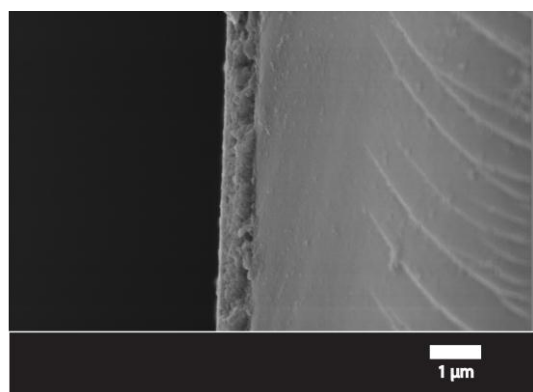

**Figure 4: Side on SEM of the TiO<sub>2</sub> film**
